# Supplementary material for: Cardiovascular Risk Assessment of Elevated Blood Pressure for Screening and Early Detection in Children 6 to 9 Years of Age in the Valencian Community: ANIVA Study
Source: MDPI journal article supplement (doi:10.3390/children10121928), 2023-12-14
Supplement: s1 [file s1]

**Supplementary Table S1.** BMI values used for categorization.

| Sex    | Age | BMI         |               |               |         |
|--------|-----|-------------|---------------|---------------|---------|
|        |     | Underweight | Normal weight | Overweight    | Obese   |
| Male   | 6   | ≤ 14.07     | 14.08 - 17.54 | 17.55 - 19.77 | ≥ 19.78 |
|        | 7   | ≤ 14.04     | 14.05 - 17.91 | 17.92 - 20.62 | ≥ 20.63 |
|        | 8   | ≤ 14.15     | 14.16 - 18.43 | 18.44 - 21.59 | ≥ 21.60 |
|        | 9   | ≤ 14.35     | 14.36 - 19.09 | 19.10 - 22.76 | ≥ 22.77 |
| Female | 6   | ≤ 13.82     | 13.83 - 17.32 | 17.34 - 19.64 | ≥ 19.65 |
|        | 7   | ≤ 13.86     | 13.87 - 17.74 | 17.75 - 20.50 | ≥ 20.50 |
|        | 8   | ≤ 14.02     | 14.03 - 18.34 | 18.35 - 21.56 | ≥ 21.57 |
|        | 9   | ≤ 14.28     | 14.29 - 19.06 | 19.07 - 22.80 | ≥ 22.81 |
